# Supplementary material for: DNA interaction, cytotoxicity, antibacterial and antituberculosis activity of oxovanadium(iv) complexes derived from fluoroquinolones and 4-hydroxy-5-((4-hydroxyphenyl)diazenyl)thiazole-2(3H)-thione
Source: Royal Society of Chemistry journal article supplement (doi:10.1039/c5ra01222h), 2015-01-01

### Supplementary material 1: $^1\text{H}$ NMR and $^{13}\text{C}$ NMR spectrum of 4-hydroxy-5-((4-hydroxyphenyl)diazenyl)thiazole-2(3H)-thione

#### $^1\text{H}$ NMR

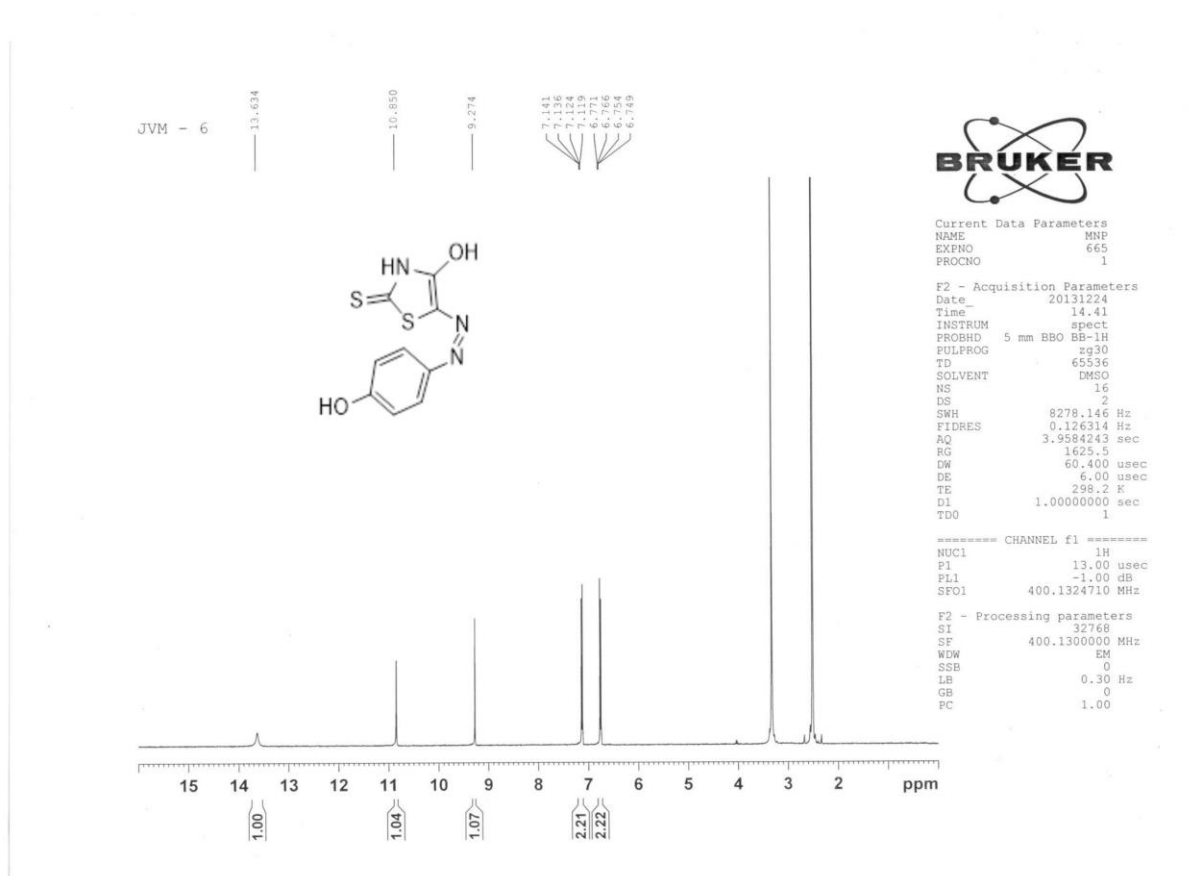

# <sup>13</sup>C NMR

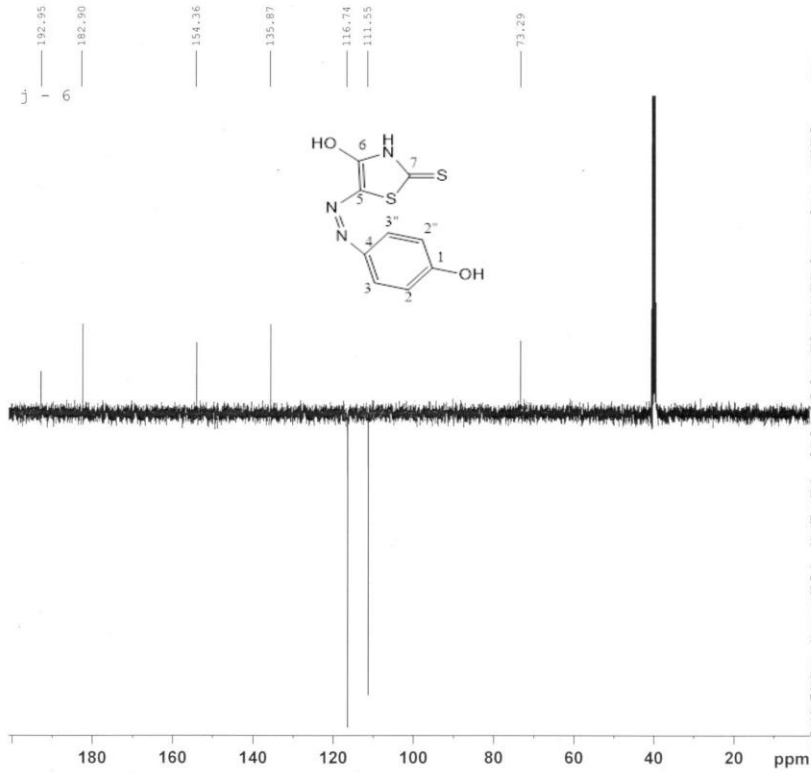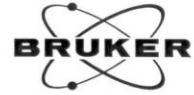

Current Data Parameters  
NAME MNP  
EXPNO 122  
PROCNO 1

F2 - Acquisition Parameters  
Date\_ 20140725  
Time 16.33  
INSTRUM spect  
PROBHD 5 mm BBO BB-1H  
PULPROG jmod  
TD 65536  
SOLVENT DMSO  
NS 1024  
DS 4  
SMH 23980.814 Hz  
FIDRES 0.365918 Hz  
AQ 1.3664756 sec  
RG 13004  
DW 20.850 usec  
DE 6.00 usec  
TE 297.6 K  
CNST2 145.000000  
CNST11 1.000000  
D1 2.0000000 sec  
d20 0.00689655 sec  
DELTA 0.00001783 sec  
TDO 1

\*\*\*\*\* CHANNEL f1 \*\*\*\*\*  
NUC1 13C  
P1 14.00 usec  
p2 28.00 usec  
PL1 -4.00 dB  
SFO1 100.6228298 MHz

\*\*\*\*\* CHANNEL f2 \*\*\*\*\*  
CPDPRG2 waltz16  
NUC2 1H  
PCPD2 80.00 usec  
PL2 -1.00 dB  
PL12 14.46 dB  
SFO2 400.1316005 MHz

F2 - Processing parameters  
SI 32768  
SF 100.6127690 MHz  
WDW EM  
SSB 0  
LB 1.00 Hz  
GB 0  
PC 1.40

**Supplementary material 2: DNA binding and cytotoxic data of fluoroquinolones and complexes 5a-5g.**

| <b>Complex</b>    | <b><math>K_b(M^{-1})</math></b> | <b><math>LC_{50}(\mu M)</math></b> |
|-------------------|---------------------------------|------------------------------------|
| CFLH              | $2.60 \times 10^3$              | 70.83±3.54                         |
| GFLH              | $2.71 \times 10^3$              | 63.94±3.19                         |
| LFLH              | $2.63 \times 10^3$              | 86.68±4.33                         |
| OFLH              | $2.56 \times 10^3$              | 88.70±4.44                         |
| SFLH              | $2.93 \times 10^3$              | 76.49±3.82                         |
| NFLH              | $2.43 \times 10^3$              | 62.26±3.11                         |
| PFLH              | $2.31 \times 10^3$              | 72.92±3.46                         |
| VOSO <sub>4</sub> | -                               | 9.99±0.50                          |
| 3                 | -                               | 10.15±0.50                         |
| 5a                | $0.22 \times 10^5$              | 2.60±0.13                          |
| 5b                | $2.92 \times 10^5$              | 8.33±0.42                          |
| 5c                | $6.91 \times 10^5$              | 8.18±0.41                          |
| 5d                | $0.91 \times 10^5$              | 9.56±0.48                          |
| 5e                | $0.35 \times 10^5$              | 2.85±0.14                          |
| 5f                | $3.34 \times 10^5$              | 7.52±0.38                          |
| 5g                | $0.97 \times 10^5$              | 5.17±0.26                          |

**Supplementary material 3: Gel electrophoresis studies of compounds.**

| Lane | Compound          | Form I (SC) | Form II (NC) | Form III (L) | % Cleavage |
|------|-------------------|-------------|--------------|--------------|------------|
| 1    | Control           | 81±3        | 19±3         | -            | -          |
| 2    | VOSO <sub>4</sub> | 73±3        | 27±3         | -            | 9.87       |
| 3    | 5a                | 22±2        | 66±2         | 12±2         | 72.83      |
| 4    | 5b                | 16±1        | 58±1         | 24±1         | 80.24      |
| 5    | 5c                | 16±3        | 64±3         | 20±3         | 80.24      |
| 6    | 5d                | 14±3        | 72±3         | 14±3         | 82.71      |
| 7    | 5e                | 20±1        | 63±1         | 17±1         | 75.30      |
| 8    | 5f                | 16±2        | 63±2         | 21±2         | 80.24      |
| 9    | 5g                | 23±1        | 63±1         | 14±1         | 71.60      |
| L    | Compound 3        | 80±5        | 20±5         | -            | -          |
| 10   | CFLH              | 31±5        | 58±5         | 11±5         | 63.95      |
| 11   | GFLH              | 50±3        | 35±3         | 15±3         | 41.86      |
| 12   | LFLH              | 36±3        | 51±3         | 13±3         | 58.14      |
| 1    | OFLH              | 58±4        | 27±4         | 15±4         | 32.56      |
| 14   | SFLH              | 60±5        | 22±5         | 18±5         | 30.23      |
| 15   | NFLH              | 55±4        | 30±4         | 15±4         | 36.04      |
| 16   | PFLH              | 55±5        | 31±5         | 14±5         | 36.05      |

**Supplementary material 4: EPR spectrum of 5a at room temperature.**

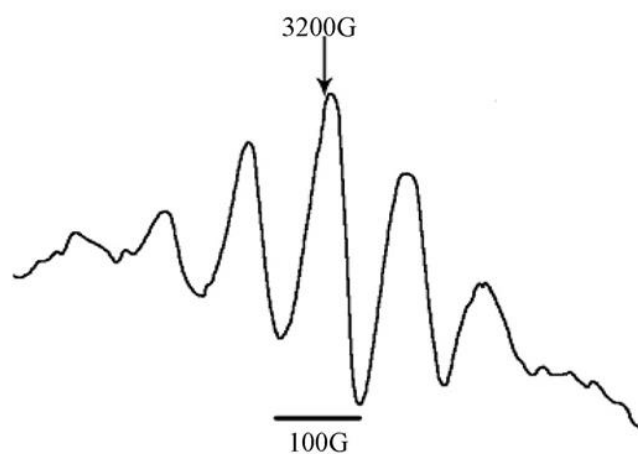

Supplement: c5ra01222h1.pdf [file c5ra01222h1.pdf]
